# Supplementary material
Source: Springer Nature journal article supplement (https://www.springermedizin.de/resource/supplementary/13256_2007_442_MOESM1_ESM.pdf/9645992)

Sc 3  
TIR/M  
SI 12

H

L

5 cm

AP -26 ant

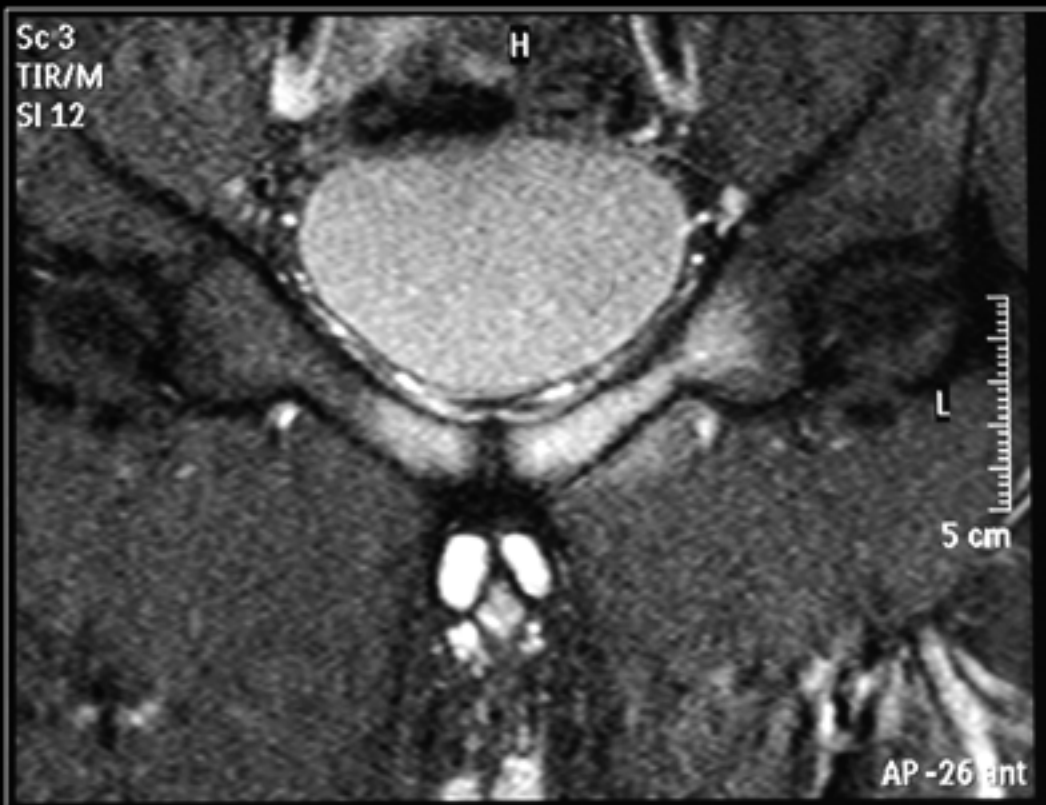

Supplement: MOESM1 [file 9645992]
